# Supplementary material for: Continuous-flow synthesis of 3,5-disubstituted pyrazolesviasequential alkyne homocoupling and Cope-type hydroamination
Source: Royal Society of Chemistry journal article supplement (doi:10.1039/c9ra01590f), 2019-01-01
Supplement: c9ra01590f1.pdf [file c9ra01590f1.pdf]

## Continuous-Flow Synthesis of 3,5-Disubstituted Pyrazoles *via* Sequential Alkyne Homocoupling and Cope-Type Hydroamination

Sándor B. Ötvös,<sup>a,b,c\*</sup> Ádám Georgiádes<sup>a</sup>, Dániel Oszvár<sup>a</sup> and Ferenc Fülöp<sup>a,b\*</sup>

<sup>a</sup> *Institute of Pharmaceutical Chemistry, University of Szeged, Interdisciplinary Excellence Center, Eötvös u. 6, H-6720 Szeged, Hungary*

<sup>b</sup> *MTA-SZTE Stereochemistry Research Group, Hungarian Academy of Sciences, Eötvös u. 6, H-6720 Szeged, Hungary*

<sup>c</sup> *Institute of Chemistry, University of Graz, NAWI Graz, Heinrichstrasse 28, A-8010 Graz, Austria*

\* Corresponding authors. Tel: +36 63 545768 (S. B. Ötvös), +36 62 545562 (F. Fülöp), Fax: +36 62545705.  
E-mail address: [otvossandor@pharm.u-szeged.hu](mailto:otvossandor@pharm.u-szeged.hu) (S. B. Ötvös), [fulop@pharm.u-szeged.hu](mailto:fulop@pharm.u-szeged.hu) (F. Fülöp)

## Supporting Information

## Table of Contents

|                                    |     |
|------------------------------------|-----|
| 1. Additional tables .....         | S3  |
| 2. Analytical data .....           | S4  |
| 3. Collection of NMR spectra ..... | S6  |
| 4. References .....                | S11 |

## 1. Additional tables

**Table S1.** Solubility test of the copper sources.<sup>a</sup>

| Entry | Catalyst                                                            | Solvent | Test No. 1. <sup>b</sup> | Test No 2. <sup>c</sup> |
|-------|---------------------------------------------------------------------|---------|--------------------------|-------------------------|
| 1     | CuOAc                                                               | DMSO    | did not dissolve         | -                       |
| 2     | CuOAc                                                               | EtOH    | did not dissolve         | -                       |
| 3     | Cu(OAc) <sub>2</sub>                                                | DMSO    | did not dissolve         | -                       |
| 4     | Cu(OAc) <sub>2</sub>                                                | EtOH    | did not dissolve         | -                       |
| 5     | CuBr(PPh <sub>3</sub> ) <sub>3</sub>                                | DMSO    | did not dissolve         | -                       |
| 6     | CuBr(PPh <sub>3</sub> ) <sub>3</sub>                                | EtOH    | did not dissolve         | -                       |
| 7     | Cu(NCCH <sub>3</sub> ) <sub>4</sub> CF <sub>3</sub> SO <sub>3</sub> | DMSO    | dissolved                | failed                  |
| 8     | Cu(NCCH <sub>3</sub> ) <sub>4</sub> CF <sub>3</sub> SO <sub>3</sub> | EtOH    | dissolved                | failed                  |
| 9     | Cu(MeCN) <sub>4</sub> BF <sub>4</sub>                               | DMSO    | dissolved                | failed                  |
| 10    | Cu(MeCN) <sub>4</sub> BF <sub>4</sub>                               | EtOH    | did not dissolve         | -                       |
| 11    | [Cu(phen)(PPh <sub>3</sub> ) <sub>2</sub> ]NO <sub>3</sub>          | DMSO    | dissolved                | succeeded               |
| 12    | [Cu(phen)(PPh <sub>3</sub> ) <sub>2</sub> ]NO <sub>3</sub>          | EtOH    | dissolved                | succeeded               |
| 13    | CuBr <sub>2</sub>                                                   | DMSO    | dissolved                | succeeded               |
| 14    | CuBr <sub>2</sub>                                                   | EtOH    | did not dissolve         | -                       |

<sup>a</sup> Conditions: 0.045 mmol catalyst in 10 mL solvent, 3 equiv. hydrazine.

<sup>b</sup> Solubility probe of the catalyst, addition of hydrazine monohydrate in case of dissolution.

<sup>c</sup> Subsequent addition of 4-ethynyltoluene in case of successful Test No. 1.

## 2. Analytical data

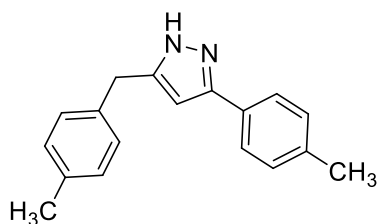

### 5-(4-Methylbenzyl)-3-(*p*-tolyl)-1*H*-pyrazole:

White solid, mp 92–95 °C. <sup>1</sup>H NMR (400.1 MHz, CDCl<sub>3</sub>): δ = 7.57-7.55 (d, *J* = 8 Hz, 2H), 7.19-7.12 (m, 6H), 6.31 (s, 1H), 3.99 (s, 2H), 2.36 (s, 3H), 2.33 (s, 3H). <sup>13</sup>C NMR (100 MHz, CDCl<sub>3</sub>): δ = 137.9, 136.2, 135.4, 129.4, 129.3, 128.7, 125.4, 32.8, 21.3, 21.1. NMR data is in agreement with the literature reference.<sup>[S1]</sup>

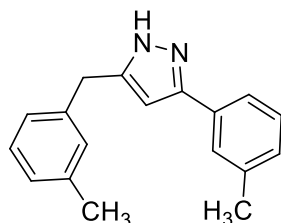

### 5-(3-Methylbenzyl)-3-(*m*-tolyl)-1*H*-pyrazole:

Colorless oil. <sup>1</sup>H NMR (400.1 MHz, CDCl<sub>3</sub>): δ = 7.50 (s, 1H), 7.48-7.46 (d, *J* = 8 Hz, 1H), 7.29-7.27 (m, 1H), 7.23-7.20 (m, 1H), 7.13-7.11 (d, *J* = 8 Hz, 1H), 7.13-7.06 (m, 4H), 6.36 (s, 1H), 2.37 (s, 1H), 2.33 (s, 1H). <sup>13</sup>C NMR (100 MHz, CDCl<sub>3</sub>): δ = 138.4, 138.3, 129.5, 128.8, 128.6, 127.4, 126.2, 125.8, 122.6, 33.1, 21.5, 21.4. NMR data is in agreement with the literature reference.<sup>[S1]</sup>

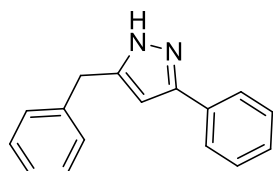

### 5-Benzyl-3-phenyl-1*H*-pyrazole:

White solid, mp 90–93 °C. <sup>1</sup>H NMR (400.1 MHz, CDCl<sub>3</sub>): δ = 7.68-7.66 (d, *J* = 7.3 Hz, 2H), 7.40-7.27 (m, 8H), 6.36 (s, 1H), 4.04 (s, 2H). 264.02. <sup>13</sup>C NMR (100 MHz, CDCl<sub>3</sub>): δ = 139.1, 132.1, 128.6, 128.5, 128.4, 126.3, 125.4, 101.5, 33.1. NMR data is in agreement with the literature reference.<sup>[S1]</sup>

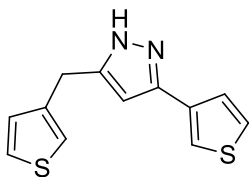

3-(Thiophen-3-yl)-5-(thiophen-3-ylmethyl)-1*H*-pyrazole:

White solid, mp 99–102 °C.  $^1\text{H}$  NMR (400.1 MHz,  $\text{CDCl}_3$ ):  $\delta$  = 7.53 (s, 1H), 7.40-7.39 (m, 1H), 7.34-7.32 (m, 1H), 7.28-7.26 (m, 1H), 7.04 (s, 1H), 6.99-6.98 (m, 1H), 6.26 (s, 1H), 4.03 (s, 2H). 247.81.  $^{13}\text{C}$  NMR (100 MHz,  $\text{CDCl}_3$ ):  $\delta$  = 138.9, 133.4, 128.3, 126.1, 125.9, 121.6, 120.6, 27.9. NMR data is in agreement with the literature reference.<sup>[S1]</sup>

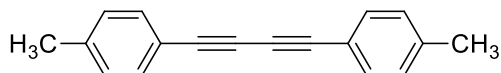

1,4-Di-*p*-tolylbuta-1,3-diyne:

$^1\text{H}$  NMR (400.1 MHz,  $\text{CDCl}_3$ ):  $\delta$  = 7.41-7.40 (d,  $J$  = 7.9 Hz, 4H), 7.15-7.13 (d,  $J$  = 7.9 Hz, 4H), 2.36 (s, 6H). NMR data is in agreement with the literature reference.<sup>[S2]</sup>

### 3. Collection of NMR spectra

#### 5-(4-Methylbenzyl)-3-(*p*-tolyl)-1*H*-pyrazole:

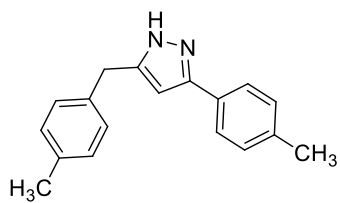

<sup>1</sup>H, CDCl<sub>3</sub>

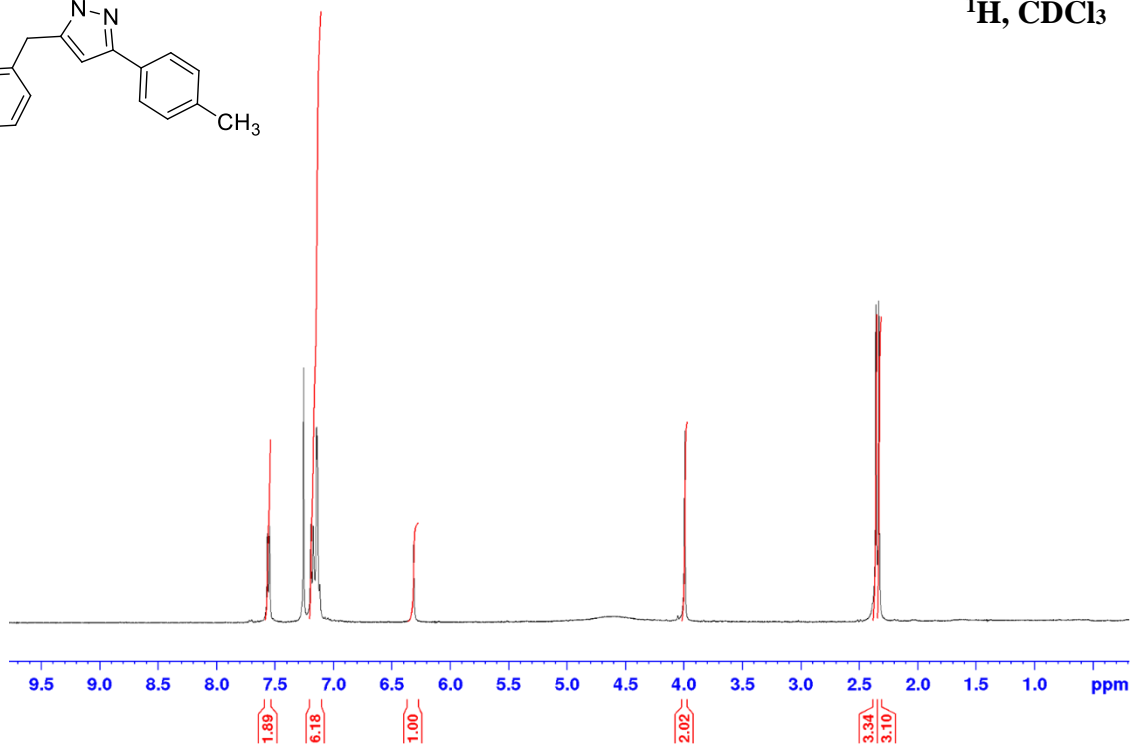

<sup>13</sup>C, CDCl<sub>3</sub>

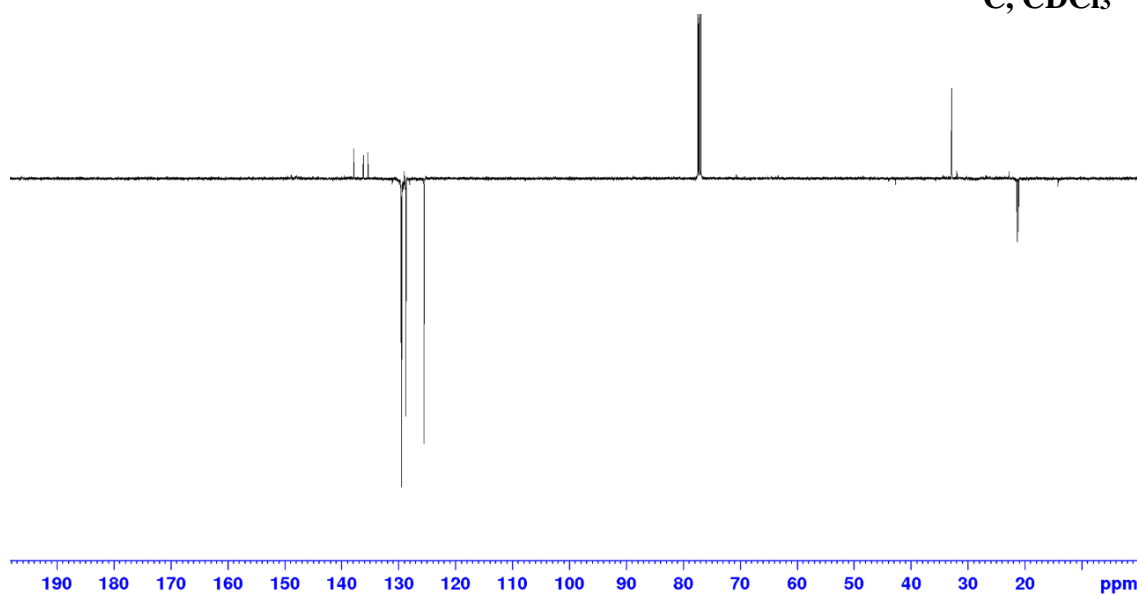

5-(3-Methylbenzyl)-3-(*m*-tolyl)-1H-pyrazole:

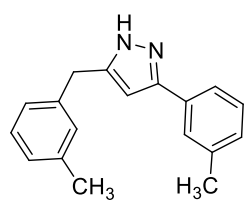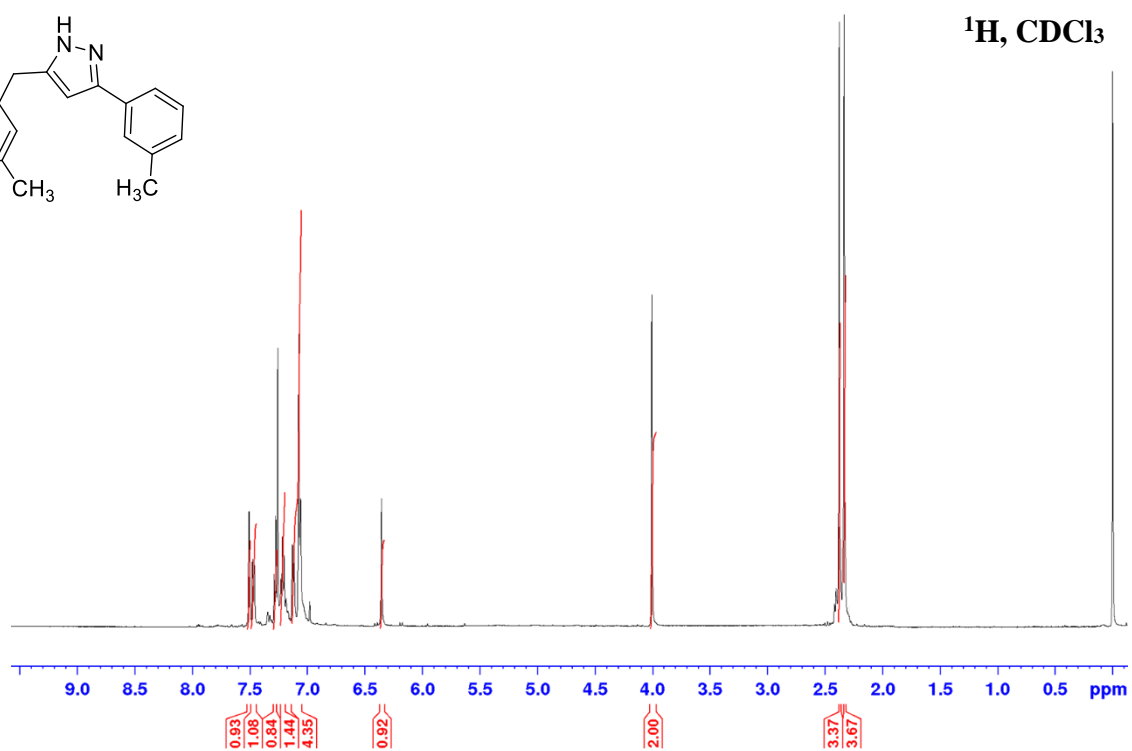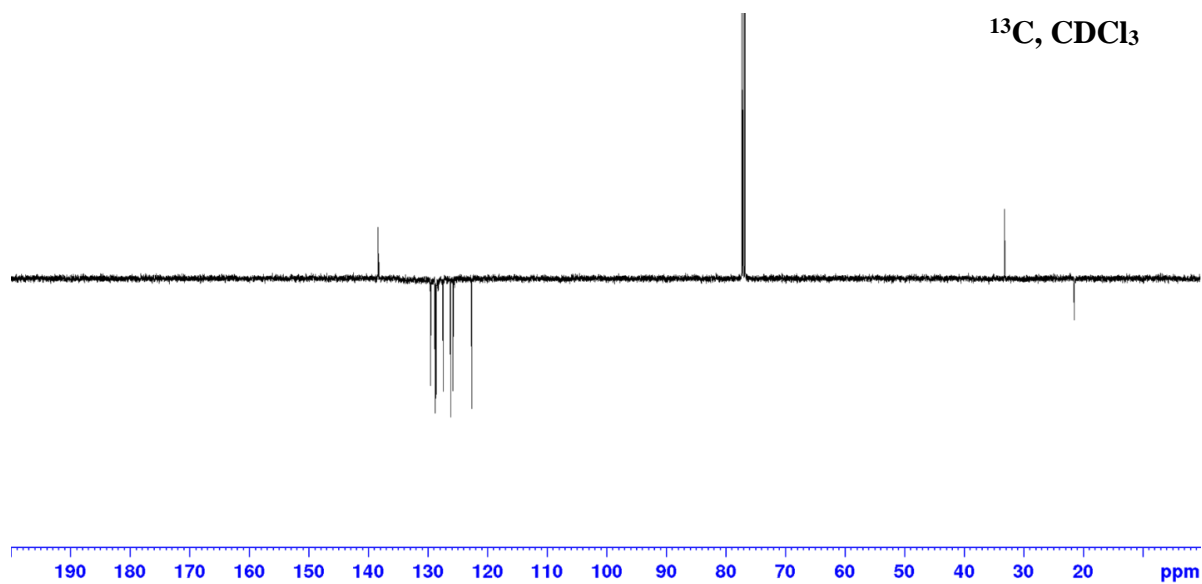

5-Benzyl-3-phenyl-1H-pyrazole:

$^1\text{H}$ ,  $\text{CDCl}_3$

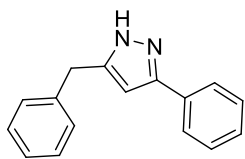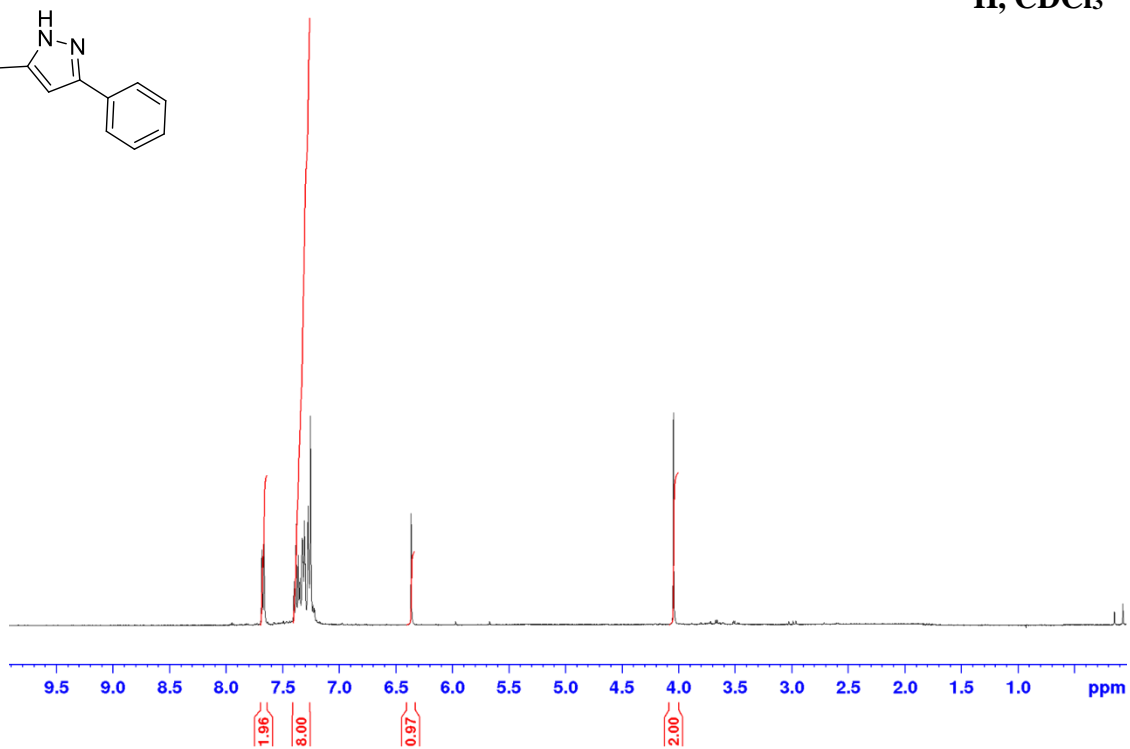

$^{13}\text{C}$ ,  $\text{CDCl}_3$

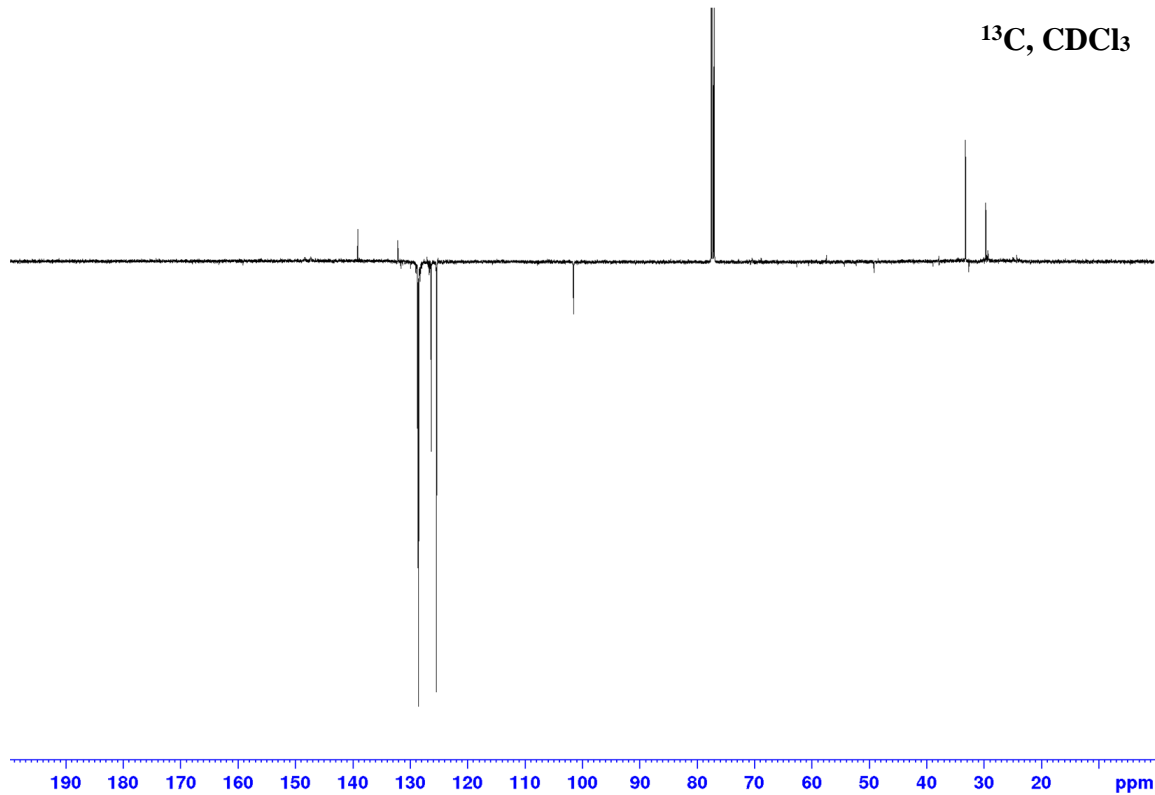



3-(Thiophen-3-yl)-5-(thiophen-3-ylmethyl)-1H-pyrazole:

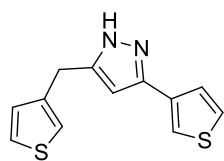

$^1\text{H}$ ,  $\text{CDCl}_3$

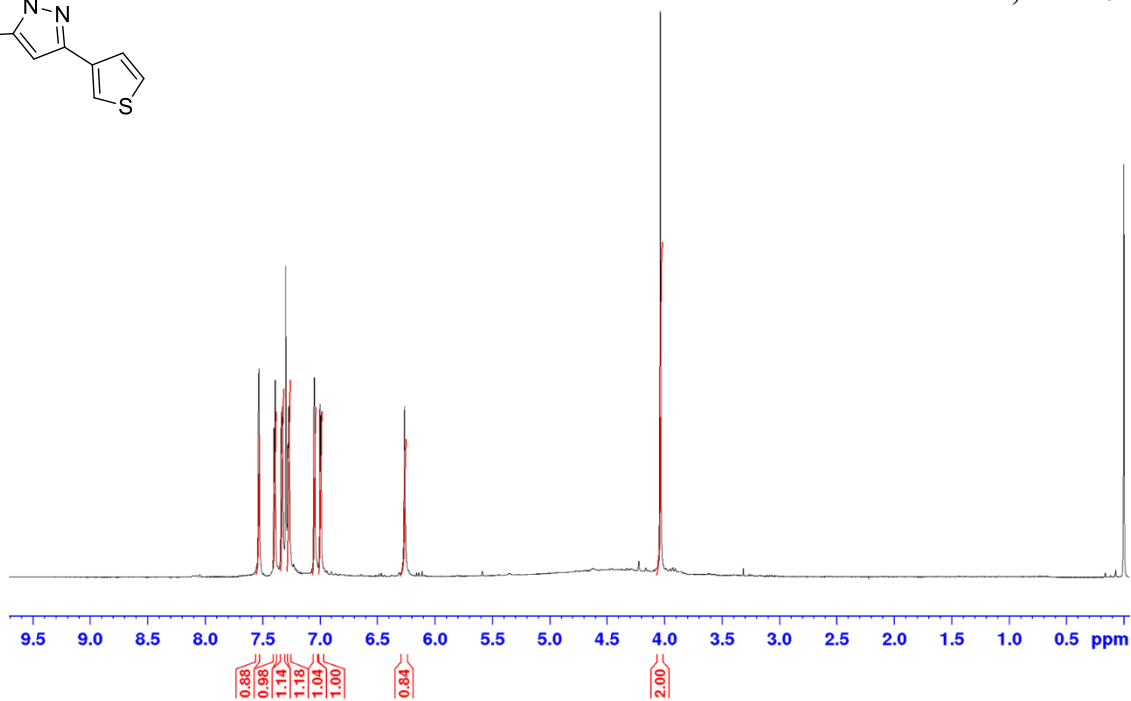

$^{13}\text{C}$ ,  $\text{CDCl}_3$

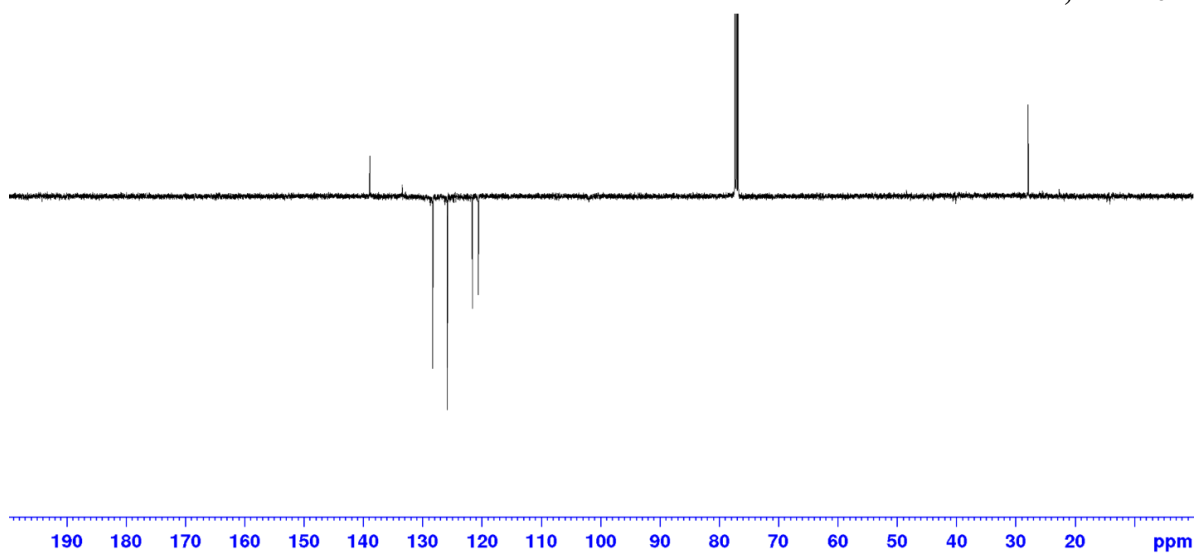

**1,4-Di-*p*-tolylbuta-1,3-diyne:**

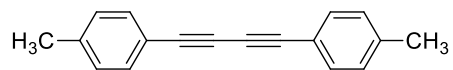

<sup>1</sup>H, CDCl<sub>3</sub>

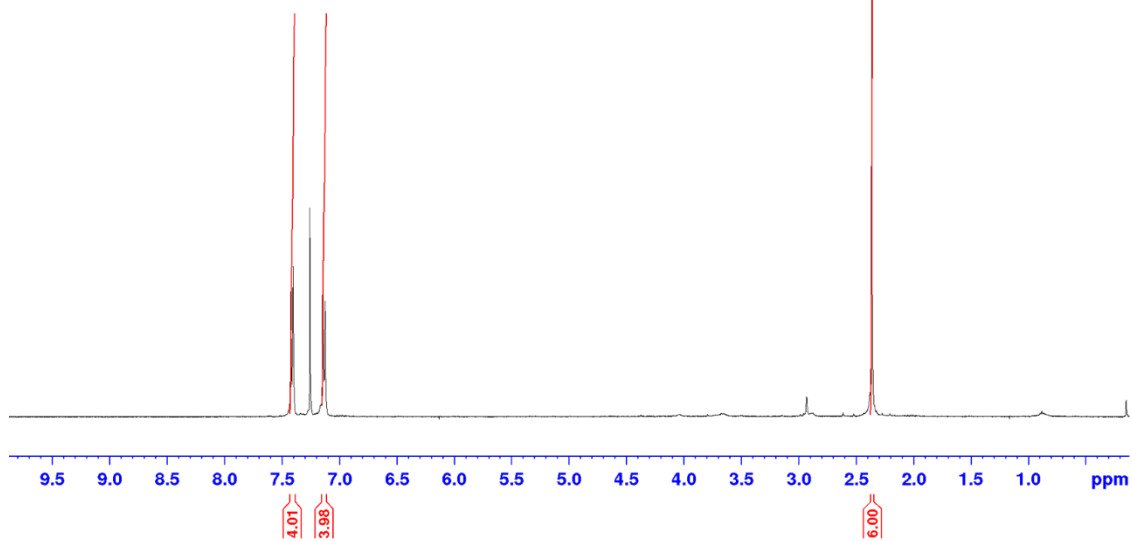

#### 4. References

- [S1] L. Wang, X. Yu, X. Feng, M. Bao, *J. Org. Chem.*, **2013**, *78*, 1693-1698.
- [S2] A. Kusuda, X.-H. Xu, X. Wang, E. Tokunaga, N. Shibata, *Green Chem.*, **2011**, *13*, 843-846.
